# Supplementary material for: Origin of enhanced photocatalytic activity and photoconduction in high aspect ratio ZnO nanorods
Source: Royal Society of Chemistry journal article supplement (doi:10.1039/c3cp51058a), 2013-01-01
Supplement: c3cp51058a.pdf [file c3cp51058a.pdf]

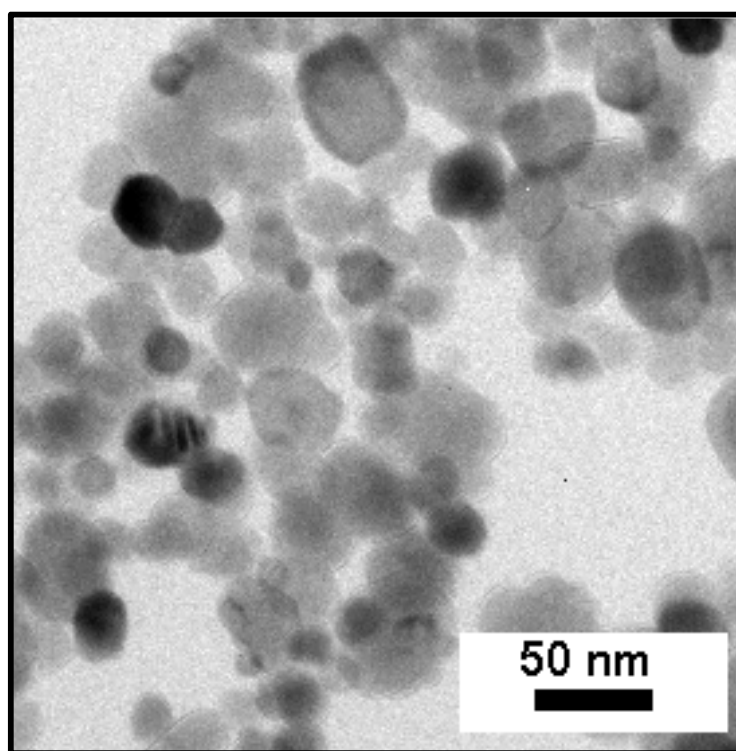

Figure S1: TEM image of synthesized ZnO nanoparticles

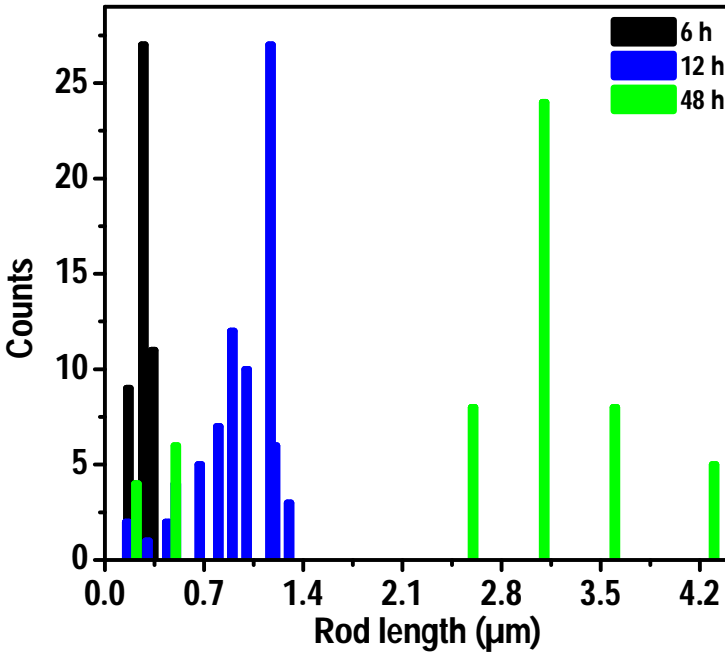

Figure S2: The histogram of length distribution of ZnO nanorods prepared at different reaction times

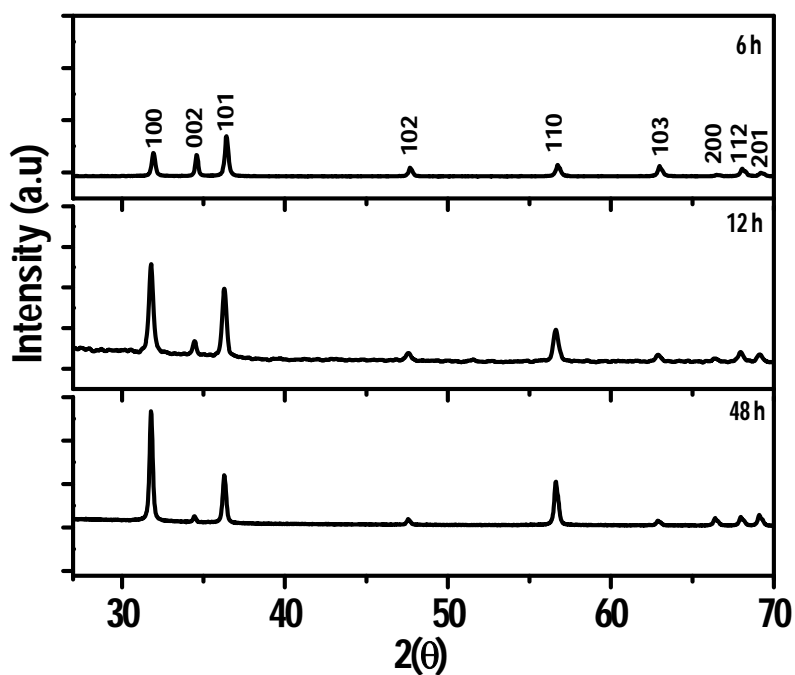

Figure S3: XRD pattern of ZnO nanorods prepared at different solvothermal reaction times 6 h (0.25  $\mu\text{m}$  length rods), 12 h (1  $\mu\text{m}$  length rods) and 48 h (3  $\mu\text{m}$  length rods) showing the intensity ratio ( $I_{100}/I_{002}$ ) difference

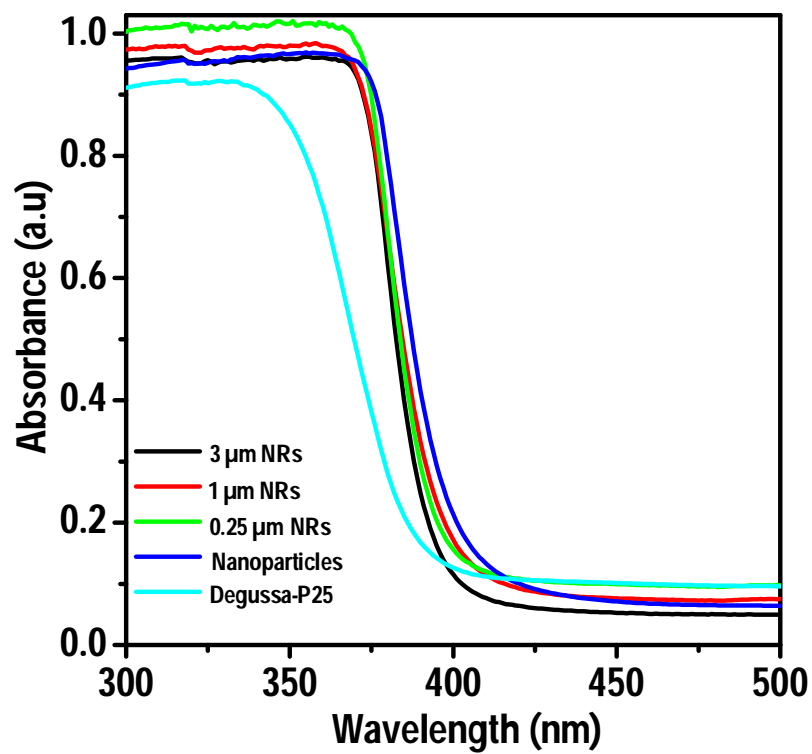

Figure S4: UV-Visible Diffuse reflectance spectra of as-synthesized ZnO nanostructures and P-25

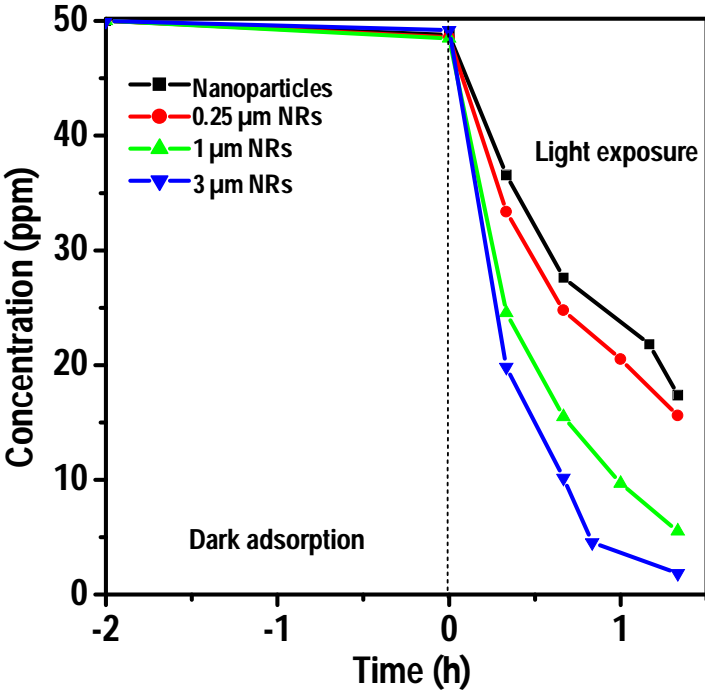

Figure S5: Equilibrium dark adsorption and photodegradation of orange G (OG) under visible light in the presence of different ZnO nanostructures.

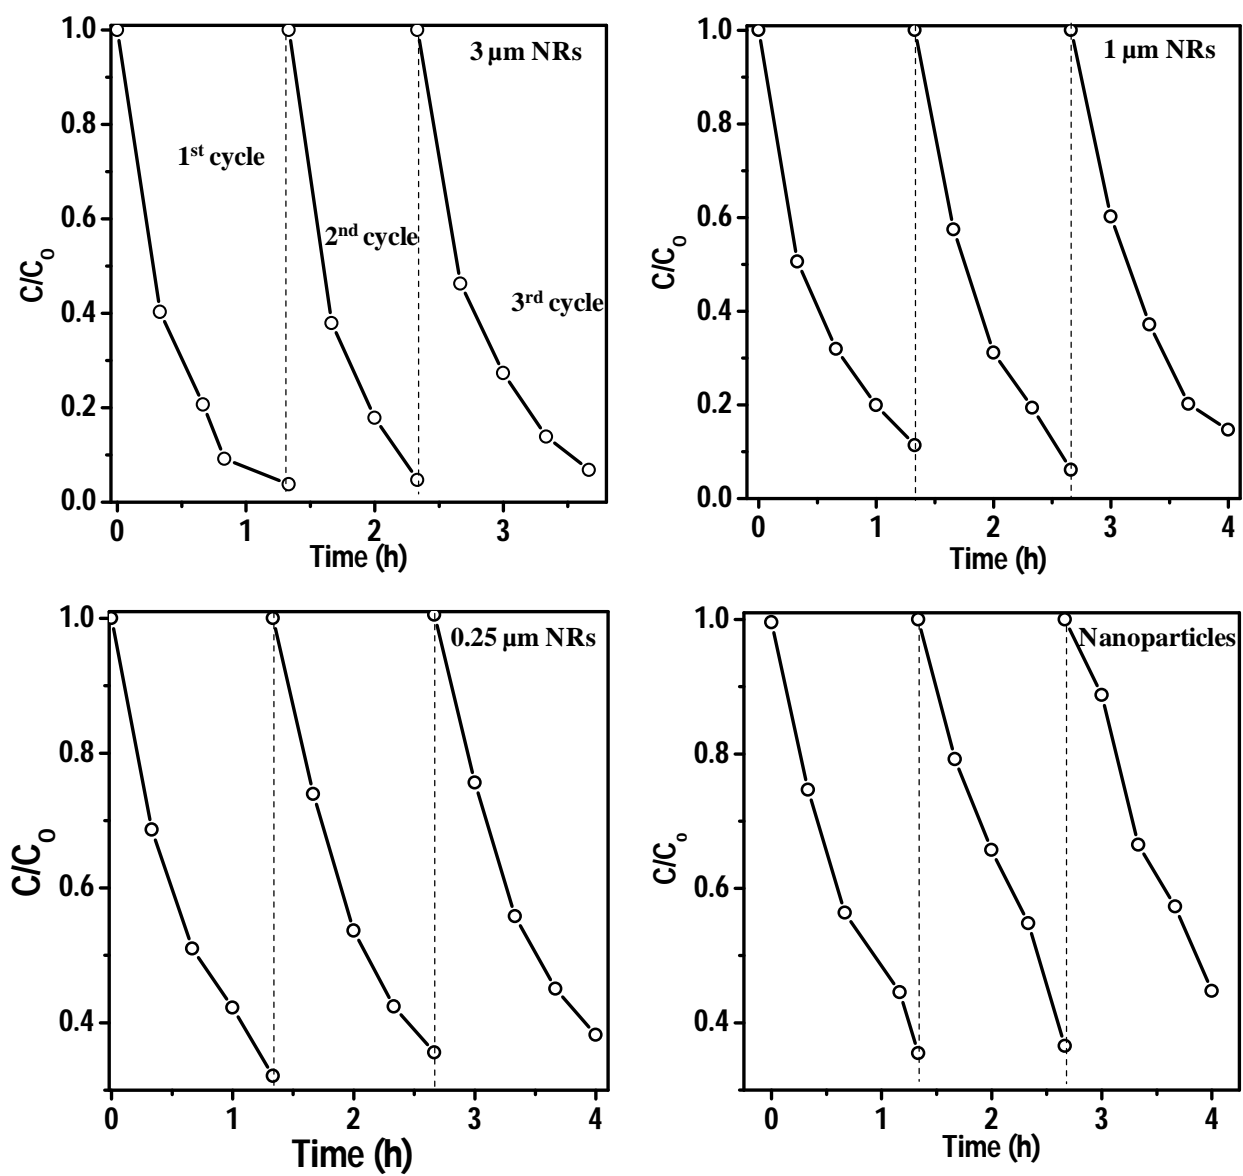

Figure S6: Cyclic photodegradation of OG under visible light in the presence of different ZnO nanostructures.

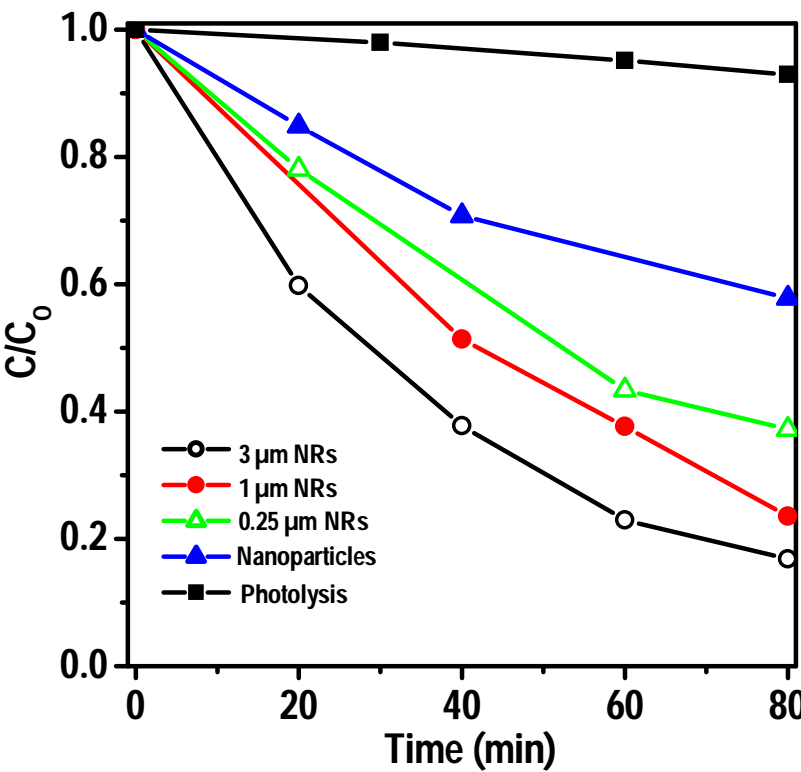

Figure S7: Photodegradation of orange G (OG) under UV in the presence of different ZnO nanostructures.

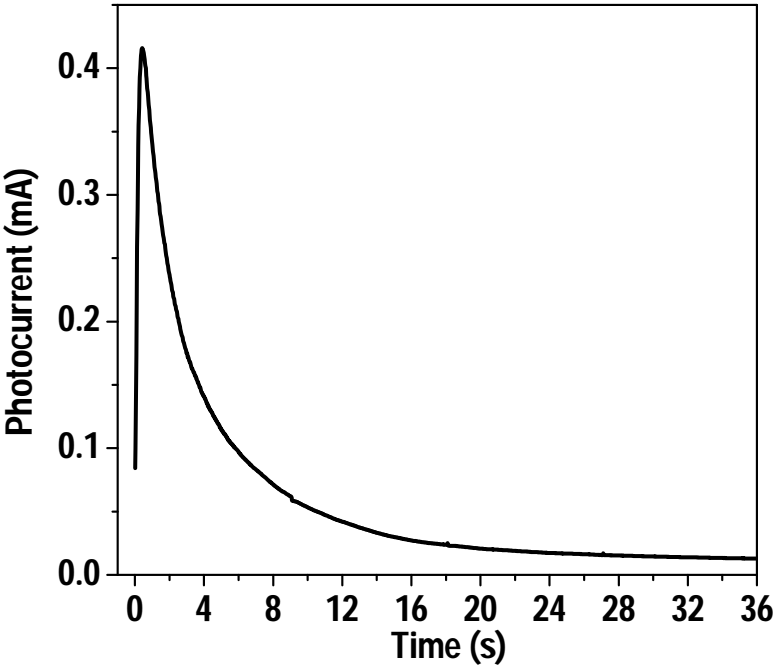

Figure S8: Decrease of photocurrent versus time for ZnO nanoparticle under illumination.



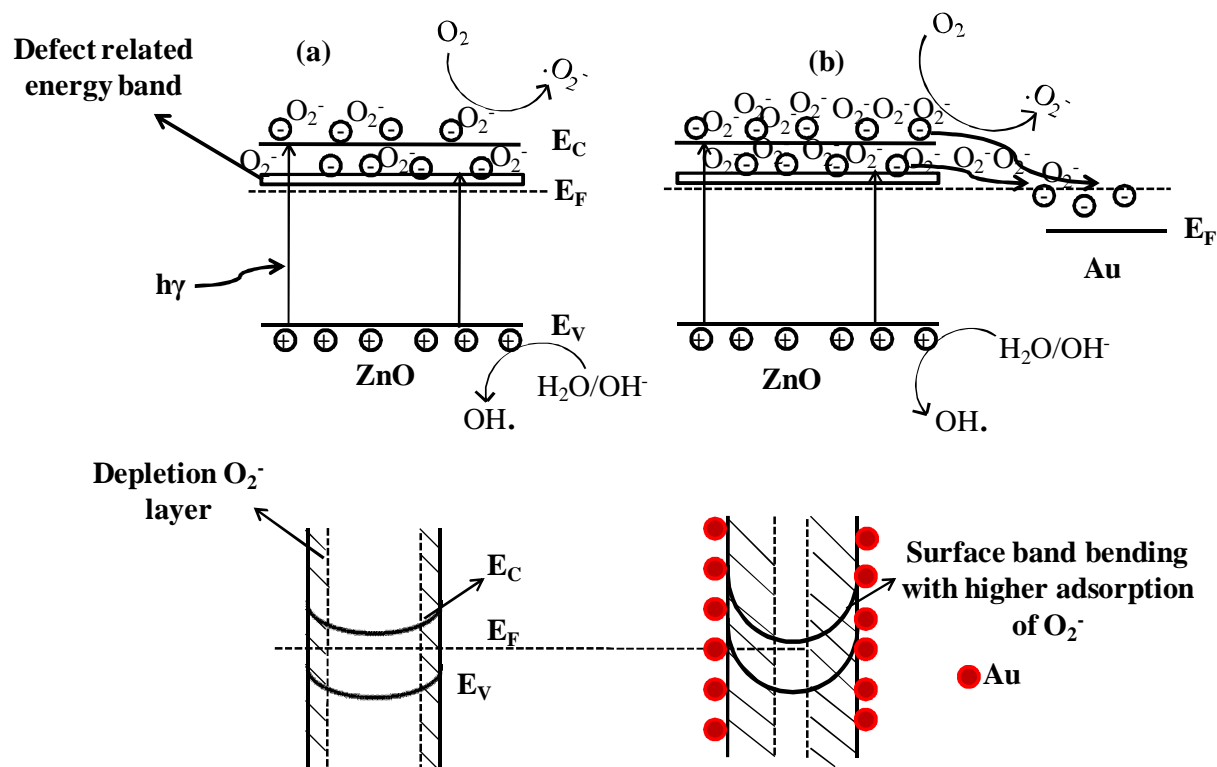

Figure S9: (a) Energy level diagram of ZnO and (b) ZnO/Au for enhanced photocatalytic activity and photocurrent generation.

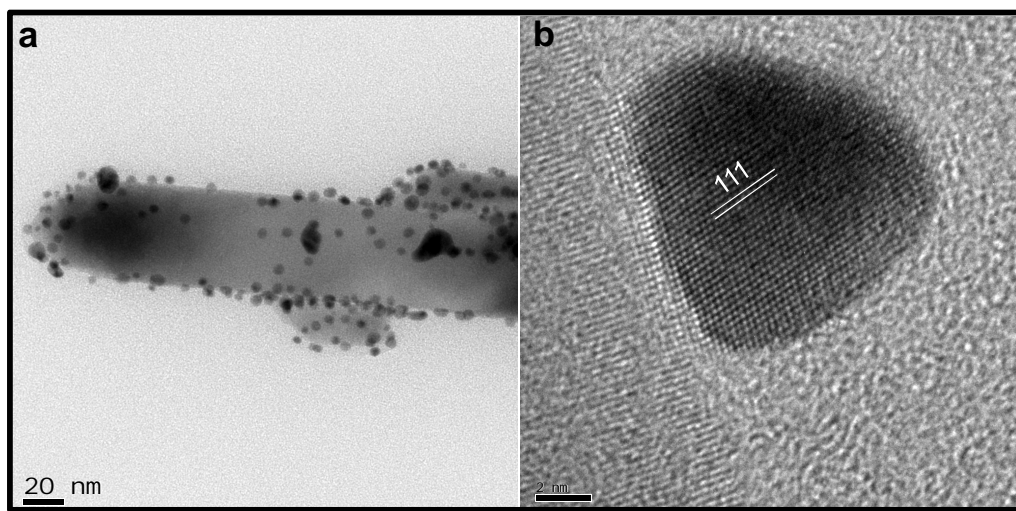

Figure S10: (a) Bright field TEM images of synthesized 1 wt % of Au on 1  $\mu\text{m}$  length nanorods and (b) its HRTEM image.

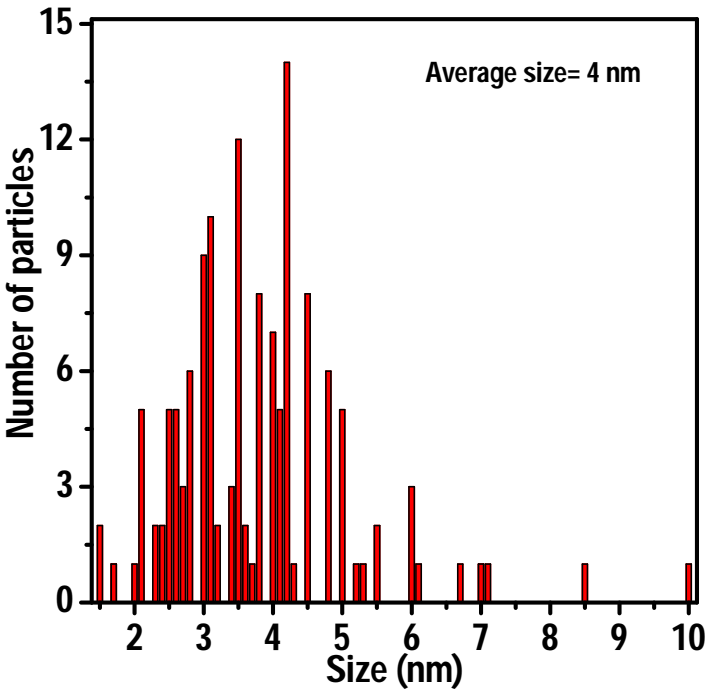

Figure S11: The size distribution histogram of Au nanoparticles on 1  $\mu\text{m}$  length nanorods.

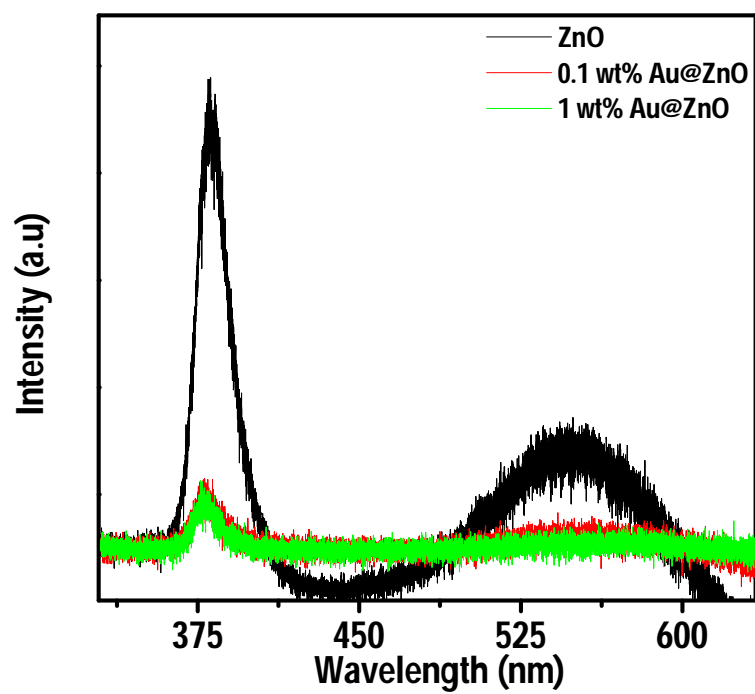

Figure S12: Photoluminescence of bare ZnO and with different Au loading % on 1  $\mu\text{m}$  length ZnO nanorods.
